# Supplementary material
Source: ML conference proceedings conference paper supplement (https://proceedings.mlr.press/v28/nguyen13.html)
Supplement: Supplementary file 1 [file nguyen13-supp.pdf]

## 1 Proof of Theorem 1

**Proof** Let us rewrite the minimization problem,

$$W^{t+1} = \arg \min_W (\langle \bar{G}^t, W \rangle + \lambda \sqrt{K} \sum_i \|W_{\cdot i}\|_2 + \frac{\beta_t}{2t} \sum_i \|W_{\cdot i}\|_2^2)$$

Since the minimization problem is component-wise on one column of  $W$ , we can focus on each of the column of  $W$  separately to find its solution.

$$W_{\cdot i}^{t+1} = \arg \min_{W_{\cdot i}} \left( \langle \bar{G}_{\cdot i}^t, W_{\cdot i} \rangle + \lambda \sqrt{K} \|W_{\cdot i}\|_2 + \frac{\beta}{2t} \|W_{\cdot i}\|_2^2 \right)$$

Since inner product of 2 vectors of same length will have smallest value when the 2 vectors are in opposite direction, solution to the above minimization problem should be  $W_{\cdot i}^{t+1} = \varphi \bar{G}_{\cdot i}^t$  where  $\varphi \leq 0$ . We now need to solve the following minimization problem,

$$\varphi = \arg \min_{\varphi \leq 0} \left( \varphi \|\bar{G}_{\cdot i}^t\|_2^2 - \varphi \lambda \sqrt{K} \|\bar{G}_{\cdot i}^t\|_2 + \varphi^2 \frac{\beta}{2t} \|\bar{G}_{\cdot i}^t\|_2^2 \right)$$

Solving for the minimum point of that familiar quadratic function, we have

$$\varphi = \begin{cases} \frac{t}{\beta_t} \left( \frac{\lambda \sqrt{K}}{\|\bar{G}_{\cdot i}^t\|_2} - 1 \right) & \text{if } \|\bar{G}_{\cdot i}^t\|_2 > \lambda \sqrt{K}, \\ 0 & \text{otherwise.} \end{cases}$$

Therefore, the update rule is as in theorem 1.

## 2 Proof of Theorem 3

**Proof** For any action  $a$ , consider the following expression, where  $x$  is a vector of all state attributes and features extracted from state  $s$  and  $e$  is the action effect leading to  $s'$  from  $s$ .

$$\begin{aligned} & \sum_{s' \in S} P^{M_1}(s'|s) \log \left( \frac{P^{M_1}(s'|s)}{P^{M_2}(s'|s)} \right) \\ &= \sum_{e \in E} P^{M_1}(e|s) \log \left( \frac{P^{M_1}(e|s)}{P^{M_2}(e|s)} \right) \\ &\leq \max_{e \in E} \log \left( \frac{P^{M_1}(e|s)}{P^{M_2}(e|s)} \right) \\ &= \max_{e \in E} \log \left( \frac{\exp(W_e^{M_1} x) / \sum_{e' \in E} \exp(W_{e'}^{M_1} x)}{\exp(W_e^{M_2} x) / \sum_{e' \in E} \exp(W_{e'}^{M_2} x)} \right) \\ &= \max_{e \in E} \left[ (W_e^{M_1} - W_e^{M_2})x - \log \left( \frac{\sum_{e' \in E} \exp(W_{e'}^{M_1} x)}{\sum_{e' \in E} \exp(W_{e'}^{M_2} x)} \right) \right] \\ &\leq \max_{e \in E} \left[ (W_e^{M_1} - W_e^{M_2})x - \log \left( \min_{e' \in E} \left( \frac{\exp(W_{e'}^{M_1} x)}{\exp(W_{e'}^{M_2} x)} \right) \right) \right] \\ &= \max_{e \in E} \left[ (W_e^{M_1} - W_e^{M_2})x - \min_{e' \in E} \left( \log \left( \frac{\exp(W_{e'}^{M_1} x)}{\exp(W_{e'}^{M_2} x)} \right) \right) \right] \\ &= \max_{e \in E} \left[ (W_e^{M_1} - W_e^{M_2})x - \min_{e' \in E} \left( (W_{e'}^{M_1} - W_{e'}^{M_2})x \right) \right] \\ &\leq \max_{e \in E} [\|W_e^{M_1} - W_e^{M_2}\|_1 \sup_s \|x(s)\|_1] + \max_{e' \in E} (\|W_{e'}^{M_1} - W_{e'}^{M_2}\|_1 \sup_s \|x(s)\|_1) \\ &\leq 2 \max_{e \in E} (\|W_e^{M_1} - W_e^{M_2}\|_1 \sup_s \|x(s)\|_1) \end{aligned}$$

The first step is from definition of *effect*. The second step is from the fact that weighted average of elements must be smaller than the largest one. The sixth step is from the property that if  $a_i$  and  $b_i$  are non-negative, then  $(\sum_i a_i) / (\sum_i b_i) \geq \min_i (a_i/b_i)$ . The seventh step is from monotonicity of logarithmic function.

By Pinsker's inequality,

$$\begin{aligned} & \sum_{s' \in S} P^{M_1}(s'|s) \log \left( \frac{P^{M_1}(s'|s)}{P^{M_2}(s'|s)} \right) \\ & \geq \frac{1}{2} \left( \sum_{s' \in S} |P^{M_1}(s'|s) - P^{M_2}(s'|s)| \right)^2 \end{aligned}$$

which implies

$$\begin{aligned} & \sum_{s' \in S} |P^{M_1}(s'|s) - P^{M_2}(s'|s)| \\ & \leq 2 \sqrt{\max_{e \in E} (\|W_e^{M_1} - W_e^{M_2}\|_1 \sup_s \|x(s)\|_1)} \end{aligned}$$

Extending to all actions,

$$\begin{aligned} & \sum_{s' \in S} |P^{M_1}(s'|s) - P^{M_2}(s'|s)| \\ & \leq \max_{a \in A} \left( 2 \sqrt{\max_{e \in E} (\|W_e^{(a), M_1} - W_e^{(a), M_2}\|_1 \sup_s \|x(s)\|_1)} \right) \\ & = 2 \sqrt{\max_{a \in A, e \in E} (\|W_e^{(a), M_1} - W_e^{(a), M_2}\|_1 \sup_s \|x(s)\|_1)} \end{aligned}$$

To complete the theorem, the following lemma (see lemma 33 in [1]) is used without proof.

**Lemma 1** Let  $M_1 = (S, A, P^{M_1}, R)$ ,  $M_2 = (S, A, P^{M_2}, R)$  be two MDPs, and fixed discount factor  $\gamma$ .  $\pi_1$  and  $\pi_2$  are their optimal policies respectively. Let  $V_\pi^M$  be the value functions of  $\pi$  in MDP  $M$ . If

$$\sum_{s' \in S} |P^{M_1} - P^{M_2}|(s'|s, a) \leq \epsilon$$

for every state-action  $(s, a)$ , then  $|V_{\pi_2}^{M_1}(s) - V_{\pi_2}^{M_2}(s)| \leq \frac{\gamma V_{max} \epsilon}{1 - \gamma}$  and  $|V_{\pi_1}^{M_2}(s) - V_{\pi_1}^{M_1}(s)| \leq \frac{\gamma V_{max} \epsilon}{1 - \gamma}$ , for every  $s \in S$ .

It is clear that

$$\begin{aligned} & \max_{s \in S} (V_{\pi_2}^{M_2} - V_{\pi_1}^{M_2}) \\ & = \max_{s \in S} (V_{\pi_2}^{M_2} - V_{\pi_1}^{M_1} + V_{\pi_1}^{M_1} - V_{\pi_1}^{M_2}) \\ & \leq \max_{s \in S} (V_{\pi_2}^{M_2} - V_{\pi_2}^{M_1} + V_{\pi_1}^{M_1} - V_{\pi_1}^{M_2}) \\ & \leq \max_{s \in S} |V_{\pi_2}^{M_2} - V_{\pi_2}^{M_1}| + \max_{s \in S} |V_{\pi_1}^{M_1} - V_{\pi_1}^{M_2}| \\ & \leq \frac{2\gamma V_{max} \epsilon}{1 - \gamma}. \end{aligned}$$

The proof is therefore complete.

## References

- [1] Li, L.: A unifying framework for computational reinforcement learning theory. Ph.D. thesis, Rutgers, The State of University of New Jersey (2009)
